# Supplementary material for: Ablation of Htra1 leads to sub-RPE deposits and photoreceptor abnormalities
Source: JCI journal article supplement (doi:10.1172/jci.insight.178827), 2025-02-10
Supplement: sd1 [file 1]

**Supplementary Figure 1. *Htra1*<sup>-/-</sup> mouse model generation and *Htra1* expression.**

**A**

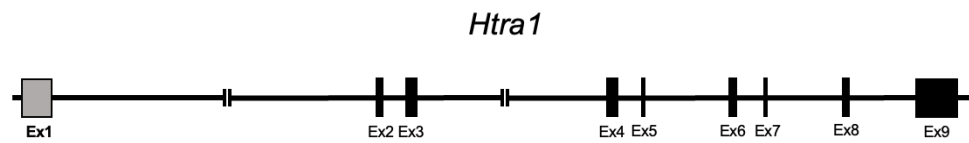

**B**

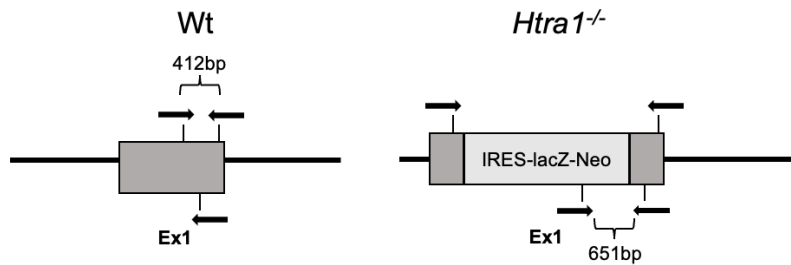

**C**

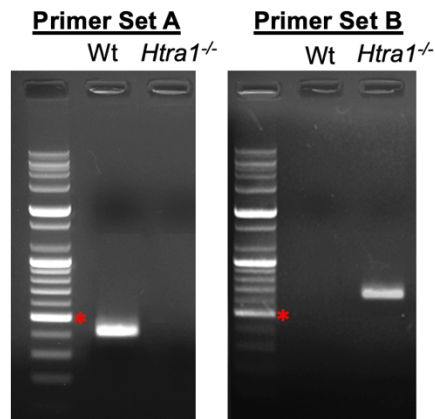

**D**

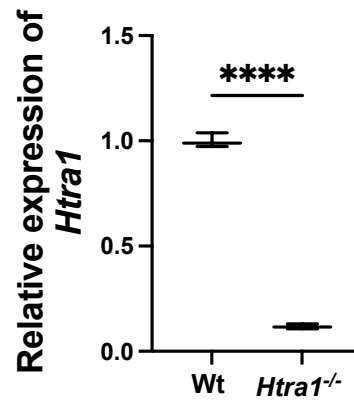

(A) Schematic diagram of the *Htra1* gene. Exon 1 is highlighted in grey. (B) Generation of *Htra1*<sup>-/-</sup> mice and location of primer binding sites for genotyping exon 1 of the Wt and *Htra1*<sup>-/-</sup> alleles. Black arrow indicates primer. (C) Primer Set A amplified a 412bp product for Wt whereas Primer Set B amplified a 412bp product for *Htra1*<sup>-/-</sup> mice. Red asterisk = 500bp. (D) qPCR confirmation of significantly low levels of *Htra1* mRNA in the *Htra1*<sup>-/-</sup> mouse model.

**Supplementary Figure 2. Dark-adapted and light-adapted ERG responses in *Htra1*<sup>-/-</sup> mice.**

**A**

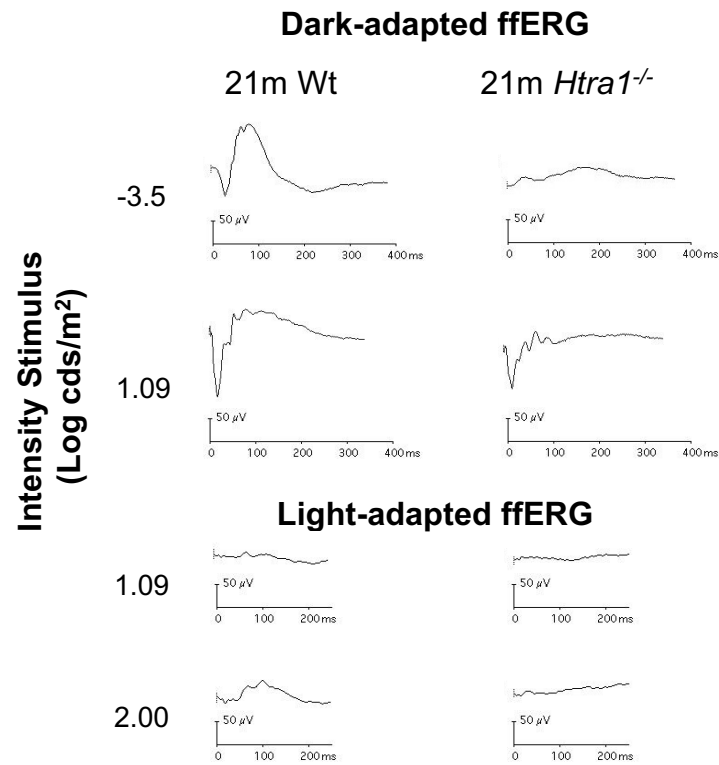

(A) Dark-adapted ERG shows the rod-mediated response and the combined rod-cone response. Light-adapted ERG shows the cone-mediated response.
